# Supplementary material
Source: PubMed Central journal article supplement (PMC7965040)
Supplement: 14-01328.pdf [file 14-01328.pdf]

**On-line Table: Agreement among semiautomatic packages**

|                                                                                              | Philips                | TeraRecon              | Siemens                |
|----------------------------------------------------------------------------------------------|------------------------|------------------------|------------------------|
| Mean paired difference degree of stenosis $\pm$ SD<br>(Bland-Altman 95% limits of agreement) |                        |                        |                        |
| 3mensio                                                                                      | -3.5 $\pm$ 13 (-30-22) | 0.55 $\pm$ 13 (-26-27) | 2.7 $\pm$ 11 (-18-24)  |
| Philips                                                                                      |                        | 5.7 $\pm$ 14 (-22-33)  | 5.1 $\pm$ 15 (-24-34)  |
| TeraRecon                                                                                    |                        |                        | -1.1 $\pm$ 17 (-33-31) |
| ICC (95% CI)                                                                                 |                        |                        |                        |
| 3mensio                                                                                      | 0.88 (0.83-0.91)       | 0.85 (0.80-0.89)       | 0.90 (0.85-0.93)       |
| Philips                                                                                      |                        | 0.84 (0.72-0.90)       | 0.80 (0.68-0.87)       |
| TeraRecon                                                                                    |                        |                        | 0.82 (0.76-0.87)       |

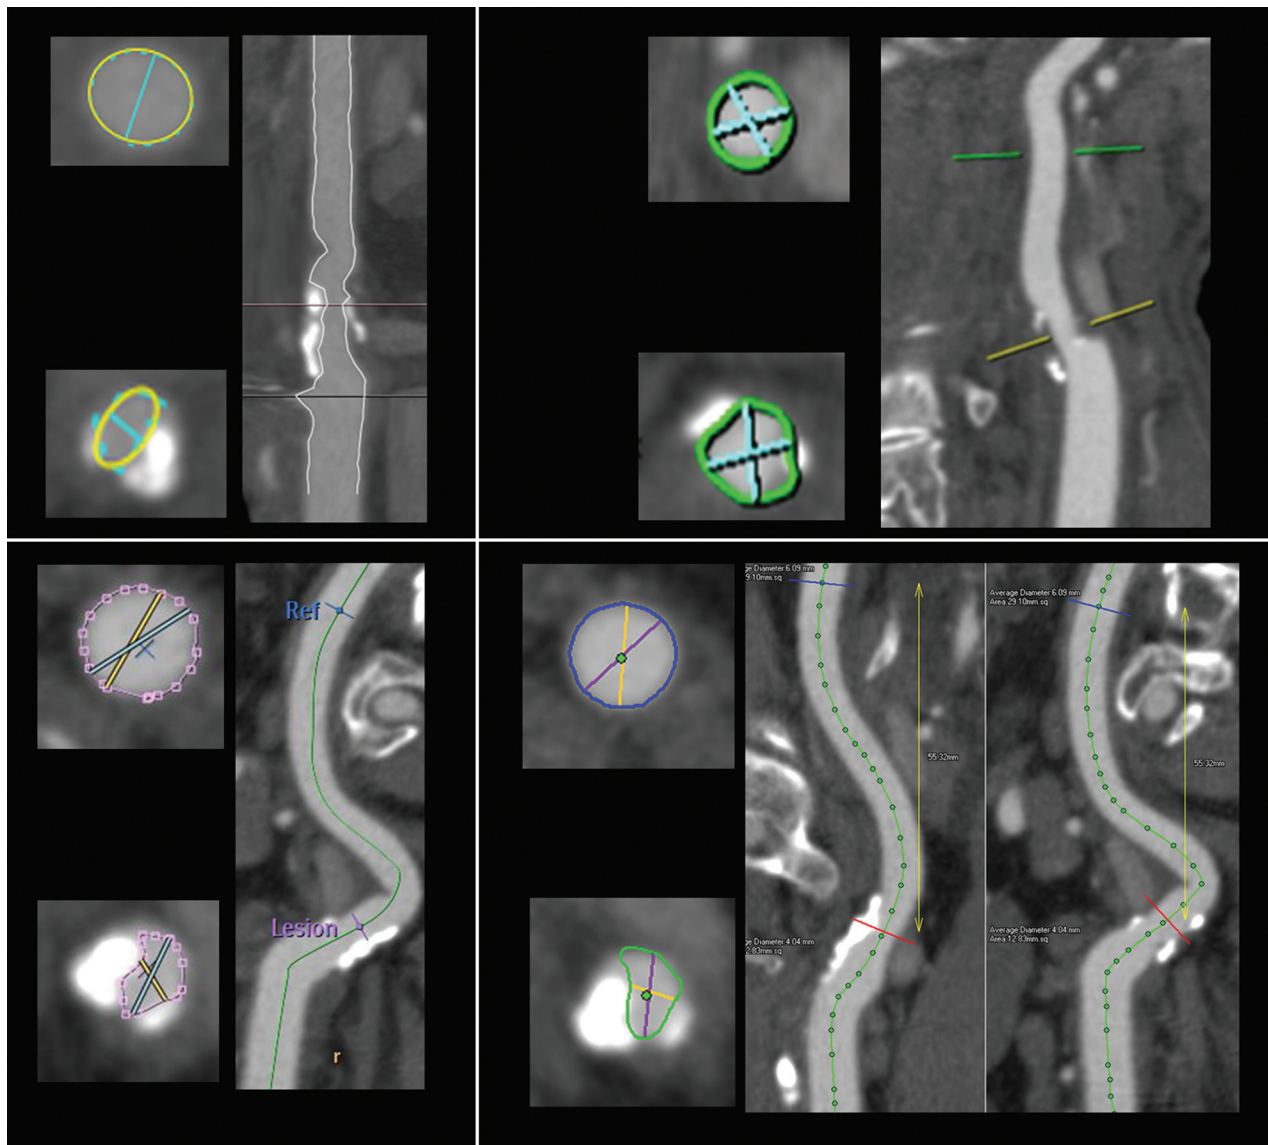

**ON-LINE FIG 1.** Examples of semiautomatic measurements with 3mensio (upper left corner), Siemens (upper right corner), TeraRecon (lower right corner), and Philips (lower left corner).
